# Supplementary material for: Reconstructing human pancreatic differentiation by mapping specific cell populations during development
Source: eLife. 2017 Jul 21;6:e27564. doi: 10.7554/eLife.27564 (PMC5540466; doi:10.7554/eLife.27564)
Supplement: Figure 2—source data 1. — Cell frequencies of the GP2hi (GP2hiECAD+), GP2+ (GP2+ECAD+), GP2- (GP2-ECAD+) and Elow (GP2-ECADlow) populations at 9.4WD. n = 4 (mean ± SEM). Cell frequencies were calculated from four independent experiments for each time point. DOI: http://dx.doi.org/10.7554/eLife.27564.004 [file elife-27564-fig2-data1.xlsx]

## Sheet: Feuil1
GP2hi	GP2+	GP2-	Elow
2.65	50	33	11.9
5.69	38.4	40.3	13.4
1.72	32.6	49.1	13.6
2.35	38.6	43	12.1
Cell frequency of GP2hi, GP2+, GP2- and Elow population from 3 pancreas at 9.1WD
