# Supplementary material for: Reconstructing human pancreatic differentiation by mapping specific cell populations during development
Source: eLife. 2017 Jul 21;6:e27564. doi: 10.7554/eLife.27564 (PMC5540466; doi:10.7554/eLife.27564)
Supplement: Figure 2—source data 2. — Cell frequencies of the GP2hi, GP2+, GP2- and Elow populations at 7-12WD. Cell frequencies were calculated from three independent experiments for each time point. DOI: http://dx.doi.org/10.7554/eLife.27564.005 [file elife-27564-fig2-data2.xlsx]

## Sheet: Legend
Cell frequencies of the GP2high, GP2+, GP2- and Elow populations at 7-12WD. Cell frequencies were calculated from 3 independent experiments for each time point.

## Sheet: GP2hi
7	7.4	8.4	9.4	11.3	12
0	0	0	3.13	5.86	16.3
			2.65	9.62	16.8
			3.34	5.89	26.1

## Sheet: GP2+
7	7.4	8.4	9.4	11.3	12
96.16	74	67.3	33.6	30.1	39.4
95.5	76.7	47.7	28.3	29.5	30.2
	69	53	29	30.7	32
	71	65.3
		57.6
		68.2

## Sheet: GP2-
7	7.4	8.4	9.4	11.3	12
1.39	20.3	26.6	53.1	44.2	22.5
3.41	19.9	38.9	55	45.4	28.2
	28	43.2	52.6	37	20.1
	23.4	33
		35.8
		28.6

## Sheet: Elow
7WD	7.4WD	8.4WD	9.4WD	11.3WD	12WD
0	0	0	9.77	12.8	20
			6.57	12.1	19.6
			11	19.4	14.2
			12.3
