# Supplementary material for: Reconstructing human pancreatic differentiation by mapping specific cell populations during development
Source: eLife. 2017 Jul 21;6:e27564. doi: 10.7554/eLife.27564 (PMC5540466; doi:10.7554/eLife.27564)
Supplement: Supplementary file 1. — (a) List of gene sets and corresponding genes used in GSEA analysis displayed in Figure 3B. Gene sets were obtained from the gene ontology database. (b) List of differentially expressed genes specific to each population at 9WD. Elow: in yellow, GP2-: in purple, GP2+: in red, M: white. Values are displayed in Log2. (c) List of differentially expressed genes specific to each population at 11WD. Elow: in yellow, GP2-: in purple, GP2+: in red, M: white. Values are displayed in Log2. DOI: http://dx.doi.org/10.7554/eLife.27564.020 [file elife-27564-supp1.xlsx]

## Sheet: Supplementary File 1a
PANCREAS DEVELOPMENT	ACVR2B;AFP;ANXA1;APC;BMP6;CCDC39;CCDC40;CCKAR;CLU;CTNNB1;DLL1;DNAAF1;FGF10;FOXA2;FOXF1;FOXO1;GATA6;HES1;HHEX;HNF1B;INSM1;INSR;ISL1;MEIS2;MEN1;MNX1;NEUROD1;NKX2-2;NKX6-1;NR5A2;ONECUT1;PAX4;PAX6;PDX1;PROX1;PTF1A;RFX3;RFX6;RFX8;SMAD2;SOX4;SOX9;TCF7L2;WNT5A;XBP1
INSULIN SECRETION	ACVR2B;ANXA1;CAMK2G;CCKAR;CYB5R4;FAM3B;HNF1B;NEUROD1;PCLO;PDX1;PTPRN;PTPRN2;RAB11FIP2;RAPGEF4;RIMS2;SLC30A8;SMAD2
REGULATION OF PEPTIDE SECRETION	ABAT;ABCC8;ACVR1C;ADRA2A;ADRA2C;ANO1;ARHGEF7;ARRB1;CACNA1C;CACNA1E;CACNA2D2;CAPN10; CCKAR;CFTR;CHD7;CRH;CRHBP;EFNA5;ENSA;ENY2;FAM132A;FFAR2;FFAR3;FOXA2;GCG;GHRL;GJA1;GNAS; HADH;HIF1A;HMGCR;HMGN3;ICA1;IL1B;INS;IRS2;ISL1;ITPR1;ITPR2;ITPR3;JAK2;KCNS3;LRP5;MCU;MTNR1B; NDUFAF2;NEUROD1;NKX6-1;NOV;NR0B2;NRXN1;OXCT1;PDE8B;PDX1; PER2;PRKCE;RAPGEF3;RAPGEF4; RBP4;REST;RFX3;RFX6;SERP1;SFRP1;SLC25A4;SLC25A5;S…
REGULATION OF HORMONE SECRETION	ABAT;ABCC8;ACVR1C;ADRA2A;ADRA2C;ANO1;ANXA1;ARHGEF7;ARRB1;BMP6;CACNA1C;CACNA1E; CACNA2D2;CAPN10;CCKAR;CFTR;CHD7;CRH;CRHBP;EDN3;EFNA5;ENSA;ENY2;FAM132A;FFAR2;FFAR3; FOXA2;GALR1;GCG;GHRL;GJA1;GNAS;HADH;HIF1A;HMGCR;HMGN3;HTR2A;ICA1;IL1B;INHBA;INS;IRS2; ISL1;ITPR1;ITPR2;ITPR3;JAK2;KCNS3;LRP5;MCU;MTNR1B;NDUFAF2;NEUROD1;NKX6-1;NOV; NR0B2;NRXN1;OXCT1;PDE8B;PDX1;PER2;PRKCE;RAB11FIP1;RAPGEF3;RAPGEF4;RBP4;R…
CALCIUM ION REGULATED EXOCYTOSIS	CADPS;CADPS2;CDK5;CPLX2;DNAJC5;NLGN1;PCLO;RAB3A;RAPGEF4;RIMS2;RIMS3;SCIN;SNAP47;SNAPIN; STX19;STX3;SYT1;SYT11;SYT14;SYT2;SYT4;SYT6;SYT7;SYTL2;TC2N;UNC13B
BICELLULAR TIGHT JUNCTION ASSEMBLY	APC;CLDN1;CLDN3;F11R;GRHL2;INADL;MARVELD2;MARVELD3;MICALL2;MPP5;MPP7;MTDH;OCLN;PARD3; PARD6A;PARD6B;SRF;STRN;WNT11
APICAL JUNCTION ASSEMBLY	APC;CLDN1;CLDN3;DLG5;F11R;GRHL2;INADL;MARVELD2;MARVELD3;MICALL2;MPP5;MPP7;MTDH;OCLN; PARD3;PARD6A;PARD6B;RHOC;SRF;STRN;VCL;WNT11
DIGESTION	ADRA2A;CCKAR;CCKBR;CEL;CELA3A;CHRM1;CHRM3;CLPS;COPA;CTRB2;CTSE;CYP39A1;ENPEP;EZR;F11R; GALR1;GALR2;GHRL;LIPG;LIPK;MEP1A;NPR3;NPY;PBLD;PGC;PLA2G1B;PLS1;PPARGC1A;PPY;RBP4;SCTR; SLC15A1;SLC26A7;SOAT2;SOX9;SST;SSTR1;SSTR2;STRAP;TJP2;UCN;VIL1;ZNF830
DIGESTIVE SYSTEM PROCESS	ADRA2A;CCKAR;CCKBR;CEL;CHRM1;CHRM3;COPA;EZR;F11R;GHRL;NPR3;PBLD;PLS1;RBP4;SLC26A7;SOAT2; SOX9;STRAP;TJP2;UCN;VIL1;ZNF830
CILIUM ORGANIZATION	ARL3;ATP6V1D;ATXN10;B9D1;BBS10;BBS7;CCDC113;CCDC39;CCDC40;CDC14A;CEP41;CSNK1D;DISC1;DMD; DNAAF1;DNAAF2;DNAH5;DNAH7;DNAI1;DYNLL1;DZIP1;DZIP1L;FLNA;FNBP1L;FOXJ1;FUZ;HYDIN;IFT122; IFT140;IFT27;IFT57;INTU;KIF24;KIF27;KIF3A;LAMA5;LRGUK;LRRC6;MKS1;MNS1;NME5;ONECUT1;PKHD1; PVRL2;RAB17;RAB3IP;RFX3;RPGR;RPGRIP1L;RSPH1;SNX10;SPAG1;SPAG16;SPAG17;SPATA6;SSX2IP; TCTN2;TRAF3IP1;TRIM59;TTC30A;TTC30B;TTC8;TTLL3;…

## Sheet: Supplementary File 1b
Gene symbol	Elow (11WD)	Elow (11WD)	Elow (11WD)	GP2- (11WD)	GP2- (11WD)	GP2- (11WD)	GP2+ (11WD)	GP2+ (11WD)	GP2hi (11WD)	GP2hi (11WD)	GP2hi (11WD)	M (11WD)	M (11WD)	M (11WD)
ST18	7.11519	5.91526	5.44646	4.0088	3.69677	3.64245	3.43033	3.4124	3.78734	3.77554	3.39843	3.41226	3.67089	3.70652
SLC30A8	8.79103	8.00512	6.03019	3.98776	3.72226	3.08423	2.83528	3.20519	2.95435	3.50785	2.96744	2.53707	3.11637	3.26741
KCNG3	5.6927	4.76638	4.82285	3.70721	4.05353	3.65967	3.73317	3.59763	3.87088	3.74616	3.60396	3.44175	3.62004	3.69535
SSTR2	7.13162	6.69577	6.23208	4.6525	4.93539	4.19692	4.02472	4.03875	4.6583	4.19845	3.71821	4.31224	4.62912	4.25411
RFX6	8.72832	8.59593	6.84933	4.81033	4.92393	3.76922	3.57316	3.62697	3.74441	3.40846	3.75583	3.37441	3.49884	3.83843
HEPACAM2	7.25653	7.12711	5.66231	3.91889	4.0035	3.38662	2.86535	3.51803	2.58947	2.7978	2.68166	2.59973	2.68996	2.56396
PAX6	9.74171	8.59451	7.42999	4.70354	5.42223	2.92719	3.30192	3.4938	2.49078	2.55837	3.44571	2.77707	2.77378	2.86992
RGS4	6.13267	5.7613	5.25598	3.38439	3.97081	3.1228	3.14511	3.19946	2.76199	2.96099	2.47669	2.97276	2.80112	2.93993
RBP4	9.27161	7.77019	6.97569	4.74078	5.58295	4.24683	3.81335	5.76091	3.75097	4.30504	3.50467	3.6272	3.87408	3.219
UNC79	7.04535	5.62192	5.1841	3.40073	3.65821	3.63669	3.61308	3.39897	3.11518	3.54624	3.6267	3.29259	3.23094	3.75454
ANKS1B	4.37975	3.78276	3.58082	2.94195	2.80408	2.88573	2.73369	2.69814	2.73942	2.74629	3.08559	2.97239	2.84727	2.84005
CELF3	7.70917	6.58299	6.74566	5.4098	4.97599	4.52435	4.76214	5.04554	4.95879	4.64705	4.86105	5.05361	4.58961	5.2626
LOC101926908	7.88012	6.72222	6.65046	4.60877	4.65219	3.52795	4.85659	3.64693	2.93746	2.98232	3.67697	3.98866	3.55234	3.96715
RGS9	6.77615	5.56596	5.25929	3.6815	3.98376	3.45483	4.23394	3.6704	3.44072	3.40777	3.50903	3.96132	3.72064	3.6704
PCSK1	8.45129	7.54297	8.33971	4.23101	4.15191	3.51507	3.56452	4.08133	4.20224	3.83043	3.82221	2.72126	3.38128	3.46388
LINC00948	6.60433	6.81534	7.03858	4.26	4.04898	2.52186	2.95354	3.10753	2.92262	2.93388	3.35084	2.27142	2.71176	2.69794
MIR7-3HG	7.93711	6.55573	7.83137	4.63209	3.8476	4.21522	3.63381	3.87249	3.13831	3.04542	3.84195	3.16395	3.81791	3.36332
EMB	7.51612	6.48608	8.43659	3.79002	4.47184	3.33563	3.99644	3.70834	3.62202	3.9238	3.87881	3.99158	4.27187	4.09269
STMN2	9.23667	8.43471	8.28678	5.53704	5.70261	5.53161	5.04479	5.03208	4.47943	4.48581	3.9985	6.13626	4.70558	5.39285
LINC00643	7.78982	7.2779	7.19868	3.15561	3.43379	3.54597	3.04466	2.4458	3.6663	2.61413	2.30142	4.15669	2.02542	2.87243
ELAVL4	4.99252	4.81409	4.36167	3.54396	3.84238	3.45017	3.43098	2.8269	3.44215	3.22521	3.21368	3.6246	3.25389	3.8155
SCG2	5.69699	5.10908	5.78893	4.08444	4.45429	3.43937	3.74057	3.11281	3.61288	2.92881	3.46992	4.17962	3.39425	3.915
SCG3	9.61259	8.75547	8.82583	5.77607	6.15227	5.34686	5.02557	5.42304	4.51432	3.35465	6.07472	4.55443	3.05449	5.16526
TET2-AS1	4.27337	3.27954	4.07756	2.34386	2.14793	2.6855	2.64891	2.38202	2.49742	2.2261	2.56779	2.32286	2.62934	2.42405
CRH	4.46138	5.90452	4.92174	3.11757	3.63683	3.46881	2.95171	2.80805	3.4325	2.99402	3.48091	2.50316	2.93649	3.15952
PEX5L	3.72283	4.33388	3.84527	2.25582	2.63676	2.50619	2.75668	2.48668	2.79011	2.64862	3.00877	2.33821	2.53394	2.44619
DNAJC12	5.54326	6.16402	4.72695	3.56914	3.65046	3.51238	3.61185	3.56499	4.04111	3.54821	3.72608	3.91811	3.2693	3.36136
MAGI2	6.20879	6.40688	6.03803	4.66235	4.23601	4.91298	4.73342	4.64647	4.52577	4.71963	4.4073	5.53946	4.40225	4.6494
ERO1LB	10.8489	10.0845	9.66831	7.5717	8.08213	6.7313	7.10827	7.2161	7.13583	7.4886	8.07087	4.83215	5.43239	5.89212
PPL	6.32896	5.60171	5.91	4.613	5.03487	4.509	4.66797	4.43838	4.39313	4.6533	4.9687	3.68239	4.37843	3.97979
TTR	11.7326	11.6928	10.9905	10.065	10.062	9.32959	8.88251	9.37406	8.14877	8.66355	8.80208	5.0792	5.39316	5.74782
CRYBA2	10.9441	10.3274	10.5435	9.0807	9.02633	6.2415	5.48812	6.31889	4.94877	6.57618	6.0072	4.47773	4.23736	5.72458
GNAZ	6.34702	6.36786	7.07859	5.51581	5.43137	5.14556	5.19946	5.75105	5.10549	5.23345	5.3038	4.92936	5.90104	5.70506
PCP4	9.63069	8.6226	8.68617	6.5579	6.77961	5.96335	3.45191	4.19759	3.02963	2.50525	3.85021	6.63397	7.50826	7.04729
LGR5	3.9038	3.69113	4.55058	5.39656	5.45941	3.92547	3.61592	3.60554	3.47235	3.35338	3.78365	3.84332	3.84987	3.69116
RAB27B	2.78033	3.05195	3.17391	4.4431	4.16296	2.98925	3.0116	2.71386	3.53989	2.83322	2.95492	2.85019	2.65307	2.78004
CYP4F30P	3.33691	4.02922	3.46388	5.64717	5.10852	3.30428	3.11451	3.59221	2.9363	3.86399	3.07425	2.7827	2.66446	3.33691
SOAT1	6.17768	6.31004	6.20704	7.2792	7.22527	6.1702	6.16772	6.40143	4.87435	5.41806	5.30787	5.5156	5.71866	4.89748
CELA3A	4.63216	6.54328	5.5609	6.88031	6.93501	8.70422	9.53933	10.1233	11.9302	12.1663	11.3361	3.92472	4.82974	8.0346
REG3G	4.70685	5.57755	4.44344	6.28029	5.2846	8.28229	9.80476	8.70164	10.7435	11.339	10.5258	3.75102	3.54486	7.27301
SYCN	5.43898	6.03804	4.2519	5.78049	5.74509	9.44743	9.13152	9.7353	11.457	11.4013	10.9696	3.86561	3.72784	6.49833
AMBP	4.46395	4.81422	3.78168	3.88397	4.84686	6.26381	6.66257	6.10098	8.17699	7.45399	7.0639	3.53784	3.22372	4.22221
CTRC	4.05756	6.05307	5.45254	4.97232	5.62948	7.03044	8.24463	8.79187	10.3654	10.8269	10.0992	4.57915	4.5235	5.38615
LOC100507639	2.47974	2.5276	2.71405	2.55055	2.33545	6.20595	4.89704	5.6796	7.71245	8.48285	7.96745	2.16712	2.43867	2.69788
PSEN2	4.32651	4.15424	4.22753	4.56878	4.52021	4.88258	5.09264	4.81145	6.04849	6.22161	6.04867	3.87654	3.73239	4.27375
PLBD1	4.48863	5.47055	5.48912	6.54483	6.74186	7.60742	7.76766	7.51043	9.27013	8.733	9.19501	5.35032	5.10094	6.8519
RBPJL	5.08174	5.98649	5.24906	5.28886	4.75567	6.11461	6.57461	7.15364	9.7035	8.53827	8.01312	4.27481	4.7913	4.95791
TMEM181	6.41199	6.60577	5.39439	6.4934	6.31166	7.10977	6.9864	7.69253	8.06566	8.39291	8.39231	5.83826	5.18059	5.41069
REG1A	3.24774	5.77785	3.01563	5.81061	4.79122	6.72779	8.07397	7.31813	9.77572	11.0824	9.47637	2.31722	2.7663	2.82214
CCKAR	6.59384	6.77863	5.95203	7.19563	6.71944	8.27533	8.37816	8.44317	10.1481	10.0413	9.13407	3.43281	3.89022	4.30421
PELI2	5.85854	4.82859	3.9961	5.54714	5.46335	5.81525	6.16528	6.56919	7.66382	7.43397	7.29784	3.52417	4.11693	4.91677
TM4SF4	4.59169	6.73395	6.07845	6.62541	7.092	7.10907	6.64997	7.24978	9.64939	8.79813	8.27196	5.03337	4.46915	5.30167
CELA2A	3.95967	4.21325	5.36536	4.39413	4.71613	4.45044	4.93722	4.20937	6.6958	7.23563	7.77447	4.29769	4.62039	4.66633
CNPY1	2.43537	2.43246	3.04229	2.67981	3.05622	2.9704	3.23654	3.21429	6.2317	7.16185	6.98561	2.33652	2.77121	2.926
ANPEP	3.49286	3.50165	4.60997	4.15237	4.81481	4.72593	5.15535	5.13375	5.86025	6.82908	6.86905	4.08834	4.31566	4.63881
RPL34	6.28426	6.95609	6.25882	6.45642	6.71393	6.84404	6.69848	7.22407	8.27846	8.93769	8.33458	6.95971	6.49696	6.26027
GP2	3.78626	4.20372	4.60689	3.73505	4.96802	5.07979	4.6378	6.81704	10.1463	9.13243	10.0045	4.17356	3.78808	5.0637
SLC39A5	4.17904	3.9288	4.54442	3.81659	3.99675	4.37462	4.41861	4.5905	6.01892	5.40189	5.38312	3.61935	4.51114	3.86718
TMEM52	3.56968	3.52901	4.66695	3.83862	4.1482	4.27193	4.43766	4.48662	5.95725	5.6168	5.11294	3.09624	4.18274	4.07145
EGF	3.16248	3.17387	3.68457	3.11396	2.86888	3.20769	3.18174	3.51245	5.00703	5.57957	4.42128	3.08327	3.42245	3.22815
PNLIPRP1	3.66737	4.07596	4.56417	3.12584	3.51002	4.81028	4.34741	3.45885	5.44377	7.333	6.27411	2.99309	3.20858	2.77255
RARRES2	6.56448	7.29766	7.58312	7.17464	7.25763	8.65087	8.62326	9.3371	10.3117	10.2478	10.006	8.84603	7.72987	8.11565
FKBP11	4.93846	5.92276	5.57324	5.86196	5.94786	6.37471	6.64972	7.00582	8.16667	8.02389	8.19251	6.29156	5.7397	7.05188
SMOC2	4.67143	4.58106	4.89716	5.18342	4.64601	5.43619	5.53057	5.93304	7.11125	7.33454	6.89673	5.43619	5.93501	5.71753
BNIP3	7.1303	6.37043	5.42601	6.81032	6.65145	7.46814	7.01522	7.95413	8.12189	8.67586	8.87436	7.18652	6.59308	5.99303
CRISPLD2	3.90266	4.2782	4.23973	3.87525	3.99463	3.77129	3.91897	3.8238	3.81287	3.84757	4.01567	6.62132	6.37106	6.26473
DCLK1	2.87759	3.41222	2.78486	2.43521	2.92245	2.79179	2.93699	2.8052	2.59661	2.42322	2.84823	6.65869	6.10581	6.37851
ITPR1	4.50197	4.68985	4.333	4.34674	4.42211	4.35457	4.35131	4.50197	4.07104	4.29424	4.48942	6.22129	6.09594	5.95038
FBN1	4.4551	5.14114	4.8119	4.93853	4.71771	3.71564	4.53961	4.45238	3.43595	4.71963	4.76764	9.03351	8.60574	8.61979
HMCN1	3.30965	3.9789	3.34882	3.76152	3.51846	2.96608	3.55184	3.55823	2.92532	3.29991	3.49316	7.02974	7.23916	6.73967
DOCK11	2.66328	3.33153	3.16535	2.7894	2.52581	2.56837	2.69869	2.94369	2.75361	3.2366	2.60356	5.76846	6.04996	5.79788
COL12A1	5.36065	6.17528	4.70375	4.80244	4.96696	4.82289	5.04666	5.60538	4.10306	5.27045	4.96957	9.40591	9.40127	8.96078
GLI3	5.12802	5.6891	4.54483	5.12618	4.85565	4.65737	5.01591	5.53102	4.17031	5.10434	4.70968	8.23477	8.38197	8.45054
DNM3OS	4.04341	5.29123	4.26487	4.18825	3.71932	4.07264	4.46105	4.96814	3.96048	4.48844	4.7017	7.50191	7.97938	7.79223
PDGFRB	3.55295	5.09803	4.16642	4.54508	3.75289	3.84823	4.96606	4.71518	3.07719	4.15096	3.8747	8.60345	7.64295	7.76968
ITGA8	2.92139	3.72199	2.85063	3.20234	2.78068	2.92674	3.81024	3.46948	2.89121	3.01722	2.92605	6.63333	6.19316	6.25981
COL5A2	4.37426	5.0955	4.2994	4.50772	3.65832	4.28052	4.55538	4.6166	3.82156	4.7324	4.24451	8.56	7.67264	7.18994
LAMA2	4.62775	4.55179	4.35678	4.38313	4.20669	3.7934	5.01069	4.9517	3.64311	4.31208	4.14418	8.40816	7.92702	7.26527
PDGFRA	4.56126	4.75848	3.98265	4.08278	4.7105	4.5048	5.23878	4.89172	3.83158	5.44657	4.12536	9.36944	9.81854	8.66524
MXRA5	3.18884	3.60348	3.38643	3.10165	3.50624	3.08616	3.73579	3.79803	3.27473	3.46853	3.3206	6.78027	6.89977	7.6138
FNDC1	3.12989	3.80827	3.364	2.97869	2.95084	2.90609	3.13043	3.336	2.98757	3.2269	3.29502	6.53422	6.70319	7.17664
EPHA3	3.24432	3.89967	3.45611	3.34871	3.64132	3.07687	3.83022	3.74807	3.48103	3.32594	3.03901	5.85009	6.22876	7.01855
MAP7D3	4.00243	4.72557	4.13909	4.0576	4.44884	3.71557	4.13757	4.22995	3.50633	3.99149	4.35734	6.57136	6.7	7.36222
ABI3BP	3.79166	4.29184	4.19541	3.46	4.36202	3.03821	3.70778	4.45212	2.97388	3.59448	3.82642	7.14316	7.44447	8.02801
VCAM1	3.61439	4.39917	3.74526	3.65969	3.96621	3.15326	4.41872	3.82854	3.6543	3.71698	4.14401	7.59737	6.64006	7.44281
ABCC9	3.2386	3.7757	3.48175	3.18842	2.76835	2.36698	3.91013	3.05961	2.778	3.10499	2.55006	6.73484	6.58382	7.02039
MYLK	4.41469	5.54392	5.20105	4.71744	4.75419	4.42906	5.26418	4.57051	4.15529	4.97254	4.75729	6.99836	7.53406	7.89299
FAT4	4.29228	5.38388	4.71712	5.21078	5.09887	4.15111	5.09887	5.00828	4.36431	4.19181	4.53861	7.46175	7.27271	8.23891
NR2F2	3.45121	4.13672	3.47484	4.28449	3.63822	3.27476	3.87101	4.27162	3.4362	3.89708	3.29214	6.78231	6.27772	6.81345
SFRP1	5.5645	6.92735	7.20576	6.59777	6.55515	5.79539	7.409	6.7247	5.66439	5.86609	5.92552	10.454	10.3029	10.009
ADAMTSL3	3.35738	3.99299	4.08631	3.87136	4.09907	3.50086	4.24402	3.83621	3.25647	3.11565	3.3825	6.4763	7.2496	6.92178
COL14A1	5.19483	5.65688	5.49993	4.97856	5.51547	4.49259	5.80088	5.76521	4.22591	4.97781	4.68667	8.49867	8.83737	8.54205
DCN	5.59687	8.13894	6.98837	6.08741	6.09651	5.51162	7.4173	6.88197	5.13745	6.987	6.47527	11.0831	11.1188	10.8354
EGFL6	4.07088	5.77981	4.7055	4.5813	4.80514	3.59276	5.04666	5.14908	3.75792	5.14842	4.13185	8.98586	8.85273	8.31034
C7	4.3829	6.38615	5.10264	5.25781	4.10806	3.44306	5.40209	5.16222	4.02785	6.13253	4.79593	10.1729	10.2841	9.41168
SPARCL1	4.31883	7.10123	5.39393	5.73641	5.37034	4.38046	5.61548	5.77806	3.87081	5.30936	5.32525	9.54023	9.70664	9.72676
IFI16	3.64894	4.86916	3.57831	4.09141	3.88682	3.0564	4.03539	4.41089	3.04864	4.53546	4.11617	7.23	7.31161	7.63611
BGN	5.39956	7.03944	6.12904	5.73916	6.12494	5.06829	6.47023	6.79583	4.96114	5.99095	5.99903	9.16599	8.66514	9.52874
CD248	5.9364	6.96185	5.83825	5.58902	6.18261	4.43863	5.91128	6.16724	4.43628	5.91128	5.21114	10.5696	9.60762	10.0417
TNC	3.31347	4.1964	3.54325	3.317	3.5185	3.18416	3.55569	3.73343	3.09859	3.38688	3.28191	5.80274	5.22574	5.739
POSTN	6.07111	7.61854	5.58458	5.93378	5.51885	4.9482	6.62566	6.63334	3.90477	5.79722	5.41823	10.4622	10.3168	9.94926
NID1	5.45853	6.26122	4.83138	5.32172	5.20663	4.58984	6.13016	5.87045	3.56892	5.9828	4.86909	8.86363	8.75989	8.90205
OGN	5.85027	7.46611	6.21684	5.77847	6.28337	5.14437	7.09718	6.78743	3.43184	6.55417	5.68348	9.80591	10.1411	10.0691
COL3A1	5.51945	7.21094	6.17301	5.8364	5.86004	4.91455	6.58815	6.61094	3.81481	6.20938	5.89893	10.9474	9.8725	9.47961
SPARC	5.77055	7.50414	5.95233	6.93628	6.7265	5.44988	6.67395	6.9207	5.52117	7.2813	6.43858	9.32181	9.31909	9.17726
VCAN	5.81964	6.53321	5.81531	6.35289	6.01266	4.92368	5.58898	5.54096	3.83266	5.73136	5.1653	9.84249	9.43737	9.49575
PPP1R12B	5.57515	6.17057	5.671	5.64831	5.3626	5.41803	5.31473	5.55053	4.85637	5.95013	5.31271	7.35589	7.26209	7.08521
ANXA1	4.29387	5.34198	4.02334	4.27268	4.44927	4.01439	4.0061	4.98824	2.72621	5.28313	4.15182	7.70674	8.7767	8.91692
LAMA4	5.91423	6.48389	4.80877	5.06545	5.02753	4.74735	6.0194	5.59655	4.55467	5.54616	4.985	8.48693	8.14527	7.77225
BCHE	4.00788	5.0667	2.90216	3.49578	3.38639	4.03231	4.74653	4.30261	3.50665	3.45757	3.41205	7.39016	7.47118	7.34432
TSHZ2	5.29774	6.14816	4.63955	5.54693	5.22341	4.91589	6.30037	5.87622	5.06432	5.89765	5.62375	7.76471	8.33222	7.70055
BOC	3.07261	3.71294	3.56541	3.10854	3.10089	3.36073	3.82131	3.30486	3.25389	3.56474	3.74748	5.76687	5.37049	5.44379
CPED1	2.56571	3.51901	3.08868	2.99569	3.00688	2.90241	3.97418	2.9109	2.84055	3.51355	3.19235	7.02458	6.04305	5.71251
SLC9A9	3.65101	3.87919	3.60706	3.83996	3.90831	3.954	4.4432	3.90831	3.83296	4.29474	3.61862	7.10165	6.09579	6.51421
OSR1	3.58724	4.6907	4.57831	4.40091	4.01317	4.09389	5.26271	4.54665	3.51978	4.64416	4.39933	7.29067	6.7495	7.32916
ARHGAP28	3.30717	3.80024	4.43243	3.84701	3.45457	4.46068	4.59993	4.28391	4.17896	4.47878	4.44975	7.29513	7.41282	6.62736
COL6A6	4.36429	4.9345	4.89032	4.91432	4.3969	4.04032	5.2398	4.9648	4.45797	4.52462	4.78371	6.26123	6.5108	6.67178
ANGPTL2	4.27804	4.12031	4.27691	4.27691	3.92735	3.81251	4.42071	4.32018	3.84572	3.95183	4.33261	5.41457	5.25241	5.59099
HSPB6	3.73524	3.80665	4.11722	3.52817	3.52469	2.9125	4.67788	3.98819	2.10918	3.69788	4.19726	5.78425	7.58352	8.07196
MATN2	5.06452	6.16969	5.99894	6.14343	6.24806	5.58867	6.37495	7.04401	4.80312	5.73189	6.17498	8.87021	9.02392	8.68735
MGP	3.16945	4.42833	4.79554	3.87113	4.16411	3.81342	4.34988	5.17434	2.67426	3.86573	4.197	6.8641	7.43586	8.33615
ZEB2	6.18216	6.74186	4.94061	5.9318	6.12631	5.26517	6.12631	5.76432	4.89294	6.97407	5.63427	9.96852	8.98591	8.56098
COL4A1	4.64011	5.06505	4.73111	4.73808	4.66346	4.36117	5.07358	4.94517	3.85168	5.27495	4.20517	8.19582	6.63496	6.52695
LGALS1	5.585	7.77154	6.10994	5.41985	5.50904	5.52705	5.89609	5.8102	4.4121	6.60746	5.51153	10.5306	8.68482	9.16464
LSAMP	4.99499	5.29235	4.27802	4.47058	5.17031	4.43701	4.91778	4.99193	3.35713	4.92543	4.98013	8.13549	7.07808	7.66023
AFAP1L2	4.53297	5.0419	4.80715	4.6892	4.70303	4.24724	4.93006	5.23059	3.30911	5.06669	4.56166	7.06603	6.0844	6.92611
NPR3	5.61414	5.59913	4.62439	4.66188	4.56691	4.14464	4.86454	4.84325	3.48196	4.94173	4.19667	7.99963	6.26104	7.4048
SLITRK3	3.02354	3.05801	3.29991	3.29991	3.63403	3.04941	3.30428	3.36629	2.66184	3.12479	3.31268	6.57337	5.19039	6.47217
ZNF385D	2.34986	2.72531	2.582	2.582	2.8078	2.582	2.57076	2.56386	2.36626	2.50088	2.59737	4.16898	3.80121	4.18563
HBE1	3.55394	4.60292	4.27062	3.6346	4.97074	4.31539	4.06396	4.75081	4.39209	4.28957	4.55014	9.40431	7.53998	9.20351
NFIX	4.85256	4.78612	4.70508	4.28538	5.24292	4.97333	5.34012	5.27691	4.62797	4.71963	5.05799	7.75725	7.17843	8.39277
GHR	2.74752	2.27054	2.36017	2.23872	2.49207	2.38416	2.33334	2.50541	2.13505	2.6724	2.53087	5.6809	3.96621	5.41846
STOM	3.62263	3.84869	3.54452	4.00025	4.18699	3.60325	3.84966	4.0998	3.404	3.75844	4.24249	5.73019	4.89971	6.07166
FAP	3.39694	4.61484	4.06496	3.76713	3.54655	3.51994	3.48631	3.53076	3.15922	3.19501	3.69094	6.59997	5.55993	6.69051
NR2F1-AS1	2.89799	3.60153	3.40183	3.11333	2.90686	3.08484	3.14471	2.70414	2.7493	2.99478	2.98686	5.62322	4.39428	6.11539
HAS2	2.90131	3.12583	3.70935	3.64925	3.21593	2.67134	2.92493	3.90035	3.23551	3.0568	2.96371	8.2721	6.99326	7.98233
HGF	2.47462	2.67078	3.50831	2.60559	2.93379	2.79474	2.60661	3.20152	2.52216	2.70242	2.48233	5.68384	5.145	5.35397
HEMGN	3.69077	3.02707	4.35231	2.51374	2.59718	2.63976	2.77968	3.58361	3.04277	3.2322	2.73458	7.95391	6.84481	7.44226
SRPX2	3.97631	3.95461	4.55538	3.82011	4.27039	3.75461	3.96621	4.29809	4.20082	3.77353	3.89909	5.96231	5.19526	6.26714
COL1A1	5.11324	6.12348	6.08222	4.88605	5.53228	5.46576	5.87093	6.53338	5.83125	4.99002	5.41296	11.0138	9.47158	9.6178
GLT8D2	3.4341	4.55393	3.82114	3.3992	3.38184	4.0187	3.80065	3.86174	4.16507	3.30565	3.88954	7.00034	6.2613	6.53571
NR2F2-AS1	3.13193	3.33507	3.42074	3.26039	3.06273	3.42104	3.39673	3.44335	4.03188	3.13065	3.35497	6.37412	6.1862	6.31703
HBM	5.01076	4.42318	5.82937	4.40795	5.42379	4.13261	4.69555	4.57805	4.25018	4.50117	4.72456	8.8905	6.59601	8.55673
NCAM2	3.7315	3.56249	3.9109	3.21422	3.54515	3.17141	3.53592	3.18686	3.15367	3.47716	3.53272	5.68955	4.63668	5.17426
ATP8A2	3.52469	3.30503	4.03841	3.23555	3.52469	3.32765	3.35733	3.32496	3.21757	3.65199	3.20483	6.10101	5.10471	4.90246
MMP2	4.71376	4.81316	4.62734	4.47047	4.61624	3.86616	4.39125	4.67143	4.45281	4.88724	4.46999	8.55832	7.03501	7.27912
COL15A1	3.75923	4.21334	3.99449	3.74133	3.5015	3.33134	3.60549	3.70208	3.30251	3.5469	3.91134	6.52906	5.18538	5.47877
GRID2	2.63807	3.02403	2.99197	2.53246	2.23227	2.09516	2.53674	2.77478	2.29436	2.57447	2.19118	5.05632	3.74978	4.6431
GPC6	5.76964	6.17273	6.84158	5.37378	5.34008	4.88101	5.54535	5.3669	5.10889	5.62657	5.61148	8.77815	8.21878	8.13338
HBZ	3.97896	4.48394	6.99915	2.23153	4.09019	2.55183	2.49365	2.45069	2.60625	2.00202	2.84326	10.6861	8.43206	10.1967
SCRG1	3.40268	3.77759	3.78049	3.11084	3.27573	3.75925	3.21025	3.02955	3.27811	3.29991	3.78809	6.13231	5.13044	5.32974
OSMR	2.85673	3.29008	2.98874	2.98325	3.20407	3.21331	3.18372	3.0305	2.80059	3.00284	3.37498	5.72129	4.35132	4.86008
TMEM132C	4.01569	4.335	3.98672	3.56392	3.98423	3.8007	3.43644	3.73297	3.89863	3.68992	4.02651	5.43964	4.7756	5.19196
ZFPM2	3.65208	5.03524	3.84546	4.65165	4.72234	3.49783	4.81315	4.91824	4.4703	4.56379	4.54607	8.10748	7.42908	7.39488
TFPI	4.10479	4.59732	3.91719	5.03818	4.99846	3.70627	4.30945	4.63502	4.27547	4.24944	4.74334	7.4666	6.47126	6.84568
HRC	4.16207	4.684	4.79897	4.98137	5.47634	4.86414	4.82958	4.50469	5.45558	5.06687	4.94555	7.98179	7.2143	7.89742
SFRP2	4.66845	5.67127	4.16792	5.12342	4.74756	4.68046	5.16058	5.25326	5.86936	5.1211	4.97259	8.2228	8.88981	8.05943
GLP2R	4.20386	4.62331	4.48194	4.24111	4.27613	4.23918	4.36823	4.3302	4.29905	4.18557	4.42682	6.76333	6.08105	5.90266
PI15	2.93551	3.27572	3.14768	2.94514	2.92645	3.00879	3.12408	3.11357	2.98929	2.77462	3.25649	6.07035	4.85269	4.70803
RYR2	3.52972	3.65234	3.53037	3.40595	3.5101	3.19613	3.39517	3.48566	3.24091	3.34122	3.5837	7.16814	6.46384	5.48832
FMOD	3.34133	3.30737	3.29709	3.29051	3.30675	2.87266	3.06874	3.01773	3.04967	3.39447	3.56203	6.84854	5.86177	4.89916
SRPX	3.74871	3.85326	4.23389	4.14891	3.87202	3.29529	3.88733	4.0818	3.86292	4.40003	4.20094	8.04066	7.76227	6.8514
PIEZO2	3.9018	4.11791	4.24975	3.89571	3.89984	3.86664	4.11791	4.15065	4.17274	3.99411	4.19807	6.13376	5.84888	5.29278
CDH11	4.60381	5.27513	5.63117	4.85943	5.09171	4.33645	4.86526	4.94271	4.30324	4.28299	4.78915	8.52155	7.82835	7.22737
LPAR4	3.40107	4.0345	3.99714	3.2795	3.6412	3.27439	3.40365	3.21025	3.48382	3.04736	3.2669	7.42273	6.66779	5.52984
SVEP1	3.11371	3.87919	3.45763	3.63169	3.71623	3.4225	3.36535	3.89309	3.24086	3.13035	3.23928	7.32402	7.41327	6.53663
NRK	2.8514	3.32485	3.51069	3.21913	3.62176	3.05346	3.15061	3.46283	2.91273	2.90518	3.24011	6.14035	6.78008	5.4357
ADAMTS12	2.79453	3.26545	3.56493	3.01155	3.1148	3.05517	3.36958	3.57908	2.84017	3.10381	3.16576	5.68893	5.95622	4.99619
FBN2	3.3039	4.11779	4.14793	3.93587	4.13381	3.785	3.77049	3.6985	3.56627	3.86602	3.62296	8.10753	7.52241	6.75558
FDCSP	2.16849	2.495	2.26039	3.36101	2.08351	2.58203	2.66039	2.85878	2.35486	2.31771	3.00844	7.52958	7.04309	6.04999
S1PR2	3.88757	4.01895	4.08489	3.97395	4.38656	3.88577	3.99883	4.37322	3.90214	3.64962	3.96147	5.80718	5.39943	5.26114
CCDC102B	4.43561	5.18948	4.7215	5.16891	4.14946	4.17845	4.23228	4.4381	4.48369	4.54903	4.29395	8.1388	7.58884	6.54999
NGF	3.18933	3.29826	3.48639	3.63855	3.1773	3.14825	3.05174	3.26567	3.00562	3.30773	2.99506	5.5751	5.86633	4.61518
MEOX2	4.20103	5.05421	4.28036	4.06065	3.76848	3.17759	3.2437	3.79169	3.57209	3.80205	3.67109	7.58802	8.11	5.97748
COL1A2	5.03522	6.90887	6.71552	6.18759	5.72936	5.84437	6.26123	6.57779	4.93897	6.00549	5.85231	10.6404	9.47563	8.78978
SEMA5A	5.4265	5.67828	6.16	5.68212	4.89091	5.36935	5.47812	5.29583	4.61952	5.49365	5.49635	7.90484	7.76942	6.98832
LDB2	4.36596	5.13755	5.33429	4.6014	4.96602	4.11447	4.26725	5.01418	4.94543	4.83571	5.4683	7.80991	8.73072	7.50025
CCL21	3.89819	3.78535	4.08831	4.32426	4.28436	4.32426	5.47776	4.69948	3.754	4.32426	4.40848	9.66262	8.0112	6.72686
PAG1	3.17644	3.50878	3.75459	4.18061	3.86452	3.58742	4.76075	3.77281	3.58522	3.98609	3.70535	6.97581	7.26271	5.55172
C1S	3.35026	3.74376	4.03147	3.53076	3.82841	3.55846	4.03551	3.84154	3.43237	4.26451	3.80686	6.78334	6.46402	4.97232
RSPO3	2.74295	3.39144	3.44329	3.15971	2.8003	3.06462	3.54527	2.85312	3.08999	3.00446	3.7051	5.52956	5.40083	4.26189
EBF2	3.12181	3.14687	3.78966	3.26334	3.14651	3.01161	3.74794	3.21253	3.27377	3.44676	2.78502	5.95771	7.15987	5.44768
LRRC17	3.07529	3.6126	3.26219	3.39128	3.16049	2.89876	3.76088	3.06173	3.12078	3.17207	2.95976	6.35095	6.64833	5.46613
ANO1	3.82857	4.17974	4.50861	4.0382	4.09755	4.28108	4.43484	4.24805	4.20741	4.21898	3.50018	6.11522	6.34876	5.86334
PRRT2	3.0333	2.7186	3.07115	2.70899	3.12095	2.98007	3.26365	2.88283	3.18873	3.33793	2.68206	4.72449	5.17937	3.92794
ZFHX4	3.3883	3.96621	3.57501	3.89296	3.96621	3.67927	3.82965	3.81145	3.625	3.21199	3.7002	5.40909	6.48379	5.45808
CMYA5	3.2347	3.41598	3.07585	3.38798	3.26233	2.98172	3.30428	3.40219	2.82313	3.17652	3.04082	4.84848	5.43644	4.32249
LRRC32	3.2818	2.83441	3.47118	3.0159	3.5264	3.10364	2.96957	3.5197	2.97369	3.21175	3.32225	5.1781	5.06376	4.09107
ARHGAP20	2.93866	3.10089	3.19015	3.12162	3.33875	3.49687	2.91107	3.34899	3.30321	3.26349	3.26607	4.69899	4.62786	3.99329
TRPC4	3.15504	3.44385	4.05285	3.69901	3.23773	3.67765	3.36173	2.94888	3.34908	2.93422	3.16622	5.70229	6.10395	4.42904
FBLN1	5.03166	5.69694	5.30064	5.58469	5.50596	5.34633	5.61076	5.54875	5.44722	5.33648	4.97006	7.81283	7.04287	6.67894
LRFN5	4.0483	5.04088	4.0272	4.22801	4.6404	4.02898	4.43421	4.4319	4.08893	4.36167	3.47413	8.42049	7.11837	6.24279
SCN7A	2.91258	4.31887	3.39239	3.6108	3.17977	3.42106	4.66542	3.43614	3.39202	3.44687	2.95447	6.7088	6.17481	5.44214
SLITRK6	3.91392	5.09307	3.22714	4.11161	3.62157	2.9162	4.73858	4.01518	3.0472	3.70162	3.27011	7.50628	6.70393	5.37171
MYO9A	5.18419	5.25452	4.52757	5.45103	4.87782	4.87873	4.71531	4.66877	4.45428	5.17401	4.94503	6.73991	7.1449	5.98278
ADAM12	4.02362	4.03129	3.60454	4.04651	3.59273	4.40553	3.72909	3.79217	3.60849	4.07549	3.62451	6.70073	6.28131	5.00579
DLC1	4.04972	4.59064	4.99873	5.67803	5.71042	4.84194	4.56569	4.95396	3.58277	4.90797	4.68484	8.15967	7.33158	8.08571
AHNAK	4.43931	4.66342	4.84807	4.71136	5.32265	3.95826	4.56256	4.3257	3.88827	4.44464	4.30879	7.10702	6.26597	6.47365
NRP1	5.16195	5.28483	4.81117	6.74464	6.60352	3.52878	5.07762	5.55874	3.52432	5.88872	5.17061	9.32532	8.87285	8.66976
RAPH1	5.99455	5.63725	4.82807	5.98228	6.21393	4.6038	5.73726	4.99983	5.02141	5.3358	5.70549	8.13315	7.255	7.51435
SLIT2-IT1	4.27763	4.60458	4.55417	5.10539	4.51942	4.3851	5.33729	4.04531	4.08715	4.22567	4.34581	6.86989	6.36936	7.07447
NRP2	4.10135	4.4381	4.50372	4.65867	4.37503	4.24141	4.65653	4.27196	3.51613	3.8407	4.29583	6.17256	5.31005	5.63862
AKAP12	5.07187	5.71447	5.59434	4.72683	4.43799	4.25292	4.58223	4.7668	3.65292	4.69555	4.25794	7.26041	7.29229	6.72678
RHOJ	4.24235	5.19593	5.45448	4.12149	4.15231	3.49096	4.45372	4.10944	3.16156	3.98728	3.48845	6.2841	6.39619	6.78166
MRC2	4.18949	4.16293	4.61014	4.19086	4.13345	3.52226	4.08171	3.9416	3.73725	3.92631	3.81263	5.6532	6.08473	5.43193
LPHN3	4.39614	4.12158	3.76735	3.40334	3.90536	3.35281	3.3386	3.8588	3.30059	3.49244	3.80225	5.43927	5.87898	5.05186
FHL5	3.89235	3.82514	3.10766	2.60058	2.42841	2.31224	2.52029	2.66067	2.61949	2.39998	2.25377	5.93562	6.82238	5.56593
GPC6-AS1	4.1432	4.64724	3.80416	3.20223	3.57017	2.59456	3.76608	3.90024	3.75507	3.71884	2.67672	6.06667	7.09332	5.44313
SULF1	5.036	5.50789	5.21756	3.80493	4.20791	2.98172	4.58043	4.32685	4.36802	5.93052	5.01169	7.90184	8.6332	7.55991
ANGPTL1	4.84145	4.38529	4.80277	4.57058	4.10283	3.63086	4.41646	4.42722	4.31831	5.05082	4.75395	6.06608	6.95187	6.23087
LIFR	6.26956	6.51527	6.86961	5.8612	5.82278	4.98403	6.77729	6.14945	4.97786	6.97013	6.32758	9.22971	9.25417	9.15515
ARHGAP10	5.23173	5.7159	5.66567	5.15474	5.25439	4.79208	5.85771	4.99968	4.98786	5.26858	5.9082	6.4087	6.77074	6.47306
NR2F1	5.92801	6.49258	6.88979	6.45523	6.83689	5.75446	6.70763	6.53585	5.89318	5.92886	6.37188	7.77656	8.0848	7.4347
ARHGAP42	4.50108	6.04028	4.66695	4.58879	5.28006	3.71734	5.48587	5.28034	3.70569	3.84782	4.81932	8.22172	7.24903	7.02102
ANTXR1	4.28781	4.57752	4.1251	5.32441	4.73612	3.80542	5.72076	4.80888	2.83679	4.23539	3.67877	7.42647	7.82759	6.41432
LRP1	5.72306	5.02406	4.5619	4.75887	4.92691	4.95761	5.12328	5.02444	4.57174	4.60835	4.26085	7.82228	6.88521	6.79115
ABCA8	4.28911	3.46314	3.71965	3.17225	3.30879	3.04624	3.8268	3.42162	3.56291	3.60074	2.99282	6.01317	5.3483	4.76539
ARHGEF25	4.59056	3.37034	3.45808	3.9129	3.14277	2.97862	3.73282	3.69356	2.53933	3.696	2.9679	6.87738	5.67542	5.06377
C1orf54	6.45979	4.92289	4.6235	5.54858	5.19661	5.83373	6.48454	6.7161	5.69775	6.33121	5.71782	9.03432	9.10429	8.85207
RGS10	2.52973	3.11532	3.72643	2.63462	2.28288	2.26333	3.13714	3.82459	2.89455	3.09668	2.81942	6.29539	6.29107	7.57805
TCF21	2.44929	3.15205	3.81639	2.52218	2.62978	2.92176	2.81458	3.23301	2.77807	2.86094	3.30195	6.49189	5.43492	7.16926
VSTM4	3.0909	3.62936	4.30282	3.11652	3.19378	2.73862	4.08229	3.47826	2.92501	3.6959	3.87077	5.86155	5.80099	7.41784
ECM2	3.92557	3.96291	3.73691	3.54133	3.5067	3.23977	3.90183	3.47139	3.54751	3.41287	3.46997	5.22598	4.92308	5.90047
IRAK3	3.51859	2.80737	3.73073	2.70917	3.12408	2.8231	3.22581	3.38021	2.95055	3.05728	2.72921	5.82867	5.96481	7.50396
IL17RD	3.96506	3.92111	4.67759	4.17963	3.85441	3.85127	4.23322	3.9459	3.92628	3.80968	3.76296	4.92104	5.39451	6.09014
CTHRC1	3.92572	4.22979	4.08109	3.79557	3.57136	3.40631	4.58838	3.75456	4.34267	3.88111	3.861	5.48942	5.23724	5.95687
STAMBPL1	4.62344	3.32007	4.01353	3.31323	2.7513	3.05833	3.34016	3.18049	3.86051	3.66593	2.58937	5.93481	7.17498	7.39896
GXYLT2	4.41146	3.72713	4.38106	4.25662	3.80623	4.45362	4.24617	4.22591	3.59294	3.55093	3.54026	6.22322	5.41006	6.95547
SH3D19	5.2414	5.15724	5.79904	5.34943	5.6061	5.93382	5.79904	5.75225	5.84523	5.98423	5.62637	6.97882	7.59304	7.90393
FERMT2	6.90504	6.75724	6.52799	6.99631	6.6574	7.00703	6.25052	6.54959	5.22389	6.45115	6.25614	8.56866	9.0413	8.61106
LEPREL1	3.61596	3.30122	3.66852	3.6483	3.59071	3.52011	2.40209	3.63339	2.65555	2.59293	2.53365	6.0431	5.50275	4.8886
FAM162B	3.66028	4.30412	4.0476	4.09544	3.81286	3.53775	3.82732	3.78257	3.80995	3.85453	4.17455	5.52277	4.79408	4.69973
ABCA9	2.93473	3.46596	2.72751	2.90447	2.32071	2.63582	2.66087	2.22459	2.53217	2.31612	2.89488	4.70979	4.43322	3.77752
DCHS1	4.46795	4.36881	4.22265	4.26819	4.07546	4.10046	3.81122	3.60943	4.39218	3.91237	4.72616	5.9066	5.32419	5.67201
LHFPL2	3.08274	4.72588	4.06536	3.74334	3.51744	4.08696	4.00078	3.39959	4.67558	3.26931	3.61994	6.54502	6.29006	5.99457
MSN	3.82829	4.81162	4.39435	4.44777	4.77195	4.63947	4.9578	4.18787	4.28388	4.74809	4.7074	6.54018	5.64565	5.6881
DOCK6	4.19655	5.04695	4.3458	4.42957	4.74032	4.63021	4.60904	4.14811	4.09683	4.46528	4.60753	5.97544	5.59366	5.24473
ALAS2	3.75322	3.53038	4.49588	3.07711	3.60952	3.47058	3.03656	3.98889	4.5795	4.28892	3.27307	7.97742	5.91684	6.94848
SPON1	3.71208	3.71208	3.50165	3.12381	3.92069	3.36375	3.56532	4.43	3.93595	4.21896	3.90092	6.41659	5.33622	5.97014
CD34	2.99684	3.48887	3.82909	3.25669	3.52912	3.05103	3.51566	3.71236	3.5081	4.52188	3.5763	5.82351	4.75172	4.95809
SOSTDC1	2.42257	3.05706	3.46388	3.15894	3.09867	2.31239	2.59709	3.39348	2.97747	2.97747	2.50084	4.36312	4.13476	4.4437
LOC100506860	5.06493	4.43239	5.21882	4.86049	4.69614	5.6342	5.5362	5.74555	5.18591	5.0447	5.93163	9.15713	7.75997	7.52591
SEMA6D	5.47318	4.7812	5.35018	4.85481	4.88053	5.19511	5.2976	5.33053	4.69565	4.47543	5.60485	7.07432	6.15785	6.38461
FAS	3.54796	3.94253	4.53251	3.4853	3.39869	4.2407	3.78804	4.31894	3.54607	3.55717	4.39807	5.65999	4.8564	5.31469
FJX1	4.90726	5.6283	5.14197	5.74556	5.62996	5.66127	5.12483	6.02086	5.62996	5.52997	6.21346	8.08247	6.91691	7.35273
OSBPL1A	5.18664	5.33144	5.06233	5.90962	5.40883	5.83326	5.30034	5.91409	5.34615	4.9427	5.4423	7.84636	7.01679	6.67291
IL6ST	6.58523	7.11024	6.07918	7.15799	7.55638	7.42654	6.9982	7.35887	7.98936	7.33129	7.26543	9.13148	8.84193	8.96614
RASSF8	3.8681	4.58963	4.02871	4.53791	4.86004	4.7621	4.06256	4.11156	3.81623	4.076	5.07541	6.12362	5.77779	6.30229
HOXA4	2.65949	2.70661	3.23444	3.08515	3.98835	4.269	2.99565	3.04372	2.52892	2.82393	3.74521	6.03119	6.00546	7.04942
SLIT2	4.60279	6.7459	6.77801	7.61263	7.33509	6.3584	6.82886	6.65821	4.53844	5.81125	4.94488	9.14303	9.23004	9.31527
PRICKLE1	5.09666	5.79889	6.40278	6.34982	6.39316	5.24323	5.16279	5.50785	4.92815	5.4116	4.17932	8.27632	8.10567	8.04648
IGFBP7	5.73374	6.70719	6.4843	7.58545	7.37838	6.85242	6.33296	7.63964	6.00068	5.89151	6.24436	8.9678	8.43918	8.07121
CALD1	6.78707	7.7073	6.27029	7.96272	7.4786	7.48179	7.40782	7.34066	6.29328	6.75984	5.85189	8.76608	9.3577	9.27098
RND3	5.14464	5.41115	5.14771	6.50986	6.60178	6.01681	5.31959	6.43278	5.75333	5.38727	4.61645	7.53927	8.08148	7.85718
PIK3R1	6.24714	7.47435	6.37568	7.68919	7.37522	6.96636	6.74845	7.63466	6.39818	7.01114	7.26856	8.93626	9.12918	9.04866
VIM	6.38581	7.47556	6.32791	7.15791	6.8753	6.82923	6.76096	7.25824	5.69618	6.90345	6.49674	8.71679	8.57659	8.17636
FSTL1	6.89134	8.77485	8.59565	9.12511	9.13002	8.55956	8.79135	8.73681	7.4534	8.88241	8.72455	10.6695	10.4712	10.7152
EVI2A	3.39119	3.54068	3.32065	4.17149	3.80392	2.77106	3.68082	4.25582	3.70969	3.13178	3.2382	4.87295	5.84637	4.99087
GPC3	4.61641	6.22517	4.55468	4.89282	4.88932	5.66365	6.40489	6.39608	6.60237	6.46452	6.70318	8.17403	8.07802	7.77149
PRKG1	3.8578	4.66695	3.66491	3.4708	3.54897	4.371	5.06684	4.13224	4.58173	4.65764	5.0969	6.88006	7.03414	6.37461
PLN	4.68993	4.90199	4.81416	5.48399	5.77642	5.2264	6.62083	5.44771	6.50761	5.31807	5.54947	7.08286	7.7872	7.68137

## Sheet: Supplementary File 1c
Symbol	Elow (9WD)	Elow (9WD)	GP2- (9WD)	GP2- (9WD)	GP2- (9WD)	GP2+ (9WD)	GP2+ (9WD)	GP2+ (9WD)	M (9WD)	M (9WD)	M (9WD)
PTPRN2	6.64804	6.78996	3.79366	4.14094	4.38953	3.60529	3.91957	3.54828	4.11388	3.65156	3.71665
ST8SIA3	6.01161	6.57158	2.94992	3.498	3.41133	2.98109	2.67656	2.98109	3.32245	2.66446	2.92212
GCH1	7.47162	7.84125	4.63711	4.71909	4.49274	4.20297	4.24305	4.29933	4.32506	3.87752	3.52103
TMED8	6.41859	6.42568	4.58206	5.06688	4.92323	4.28438	4.31506	4.3277	4.40037	3.92829	4.21
NOL4	6.85708	7.54998	3.52904	3.9636	4.42649	2.92163	3.57738	3.4825	3.27571	2.84928	3.00174
TTLL7	7.54047	7.51401	5.77817	5.99968	6.15948	5.86763	5.59757	5.36381	5.45369	4.93949	5.21239
CHGA	8.92357	9.55808	4.87018	6.27636	4.30228	3.03011	4.30478	3.47049	3.65859	2.4097	3.24674
RFX6	8.87894	8.96244	5.0017	6.0325	3.5772	3.34371	4.03003	3.49015	3.62724	3.12864	2.84356
HEPACAM2	6.79326	7.29074	2.88367	4.69122	3.01402	2.52938	2.83921	2.23823	2.33154	2.15778	2.32307
NEUROD1	7.63971	8.86332	4.12149	6.15124	4.17154	2.80678	3.64077	3.71376	3.58486	2.9661	2.70818
LOC101926908	7.60804	7.58427	3.80198	4.37024	3.69358	3.27436	3.74544	3.20681	5.0163	3.12719	3.52624
MLXIPL	6.2117	6.33637	4.10274	4.35785	3.79953	3.70611	3.82399	3.48258	4.89204	3.56811	3.41713
ATP2A3	6.36751	6.10104	4.71346	4.8072	4.57198	4.21212	4.16609	4.03894	5.16056	4.38523	4.22837
CHGB	7.77218	8.64084	3.8053	4.52359	4.35053	2.74355	3.87428	2.65652	4.55689	3.44747	3.13498
RGS4	5.41371	5.63991	2.78734	3.65848	2.92445	2.90282	2.47669	2.99218	3.77301	2.90748	2.69019
KCNK16	7.09864	6.60622	4.75378	5.0083	4.11178	4.40634	4.19679	3.74025	4.6875	4.2796	3.62516
DACH1	7.57402	8.11611	4.77998	5.6909	5.56966	3.84274	3.75671	3.84558	5.32368	3.71211	4.26657
MIR1179	9.66394	10.2128	5.06197	5.74018	4.64118	4.73918	5.43986	4.97071	6.21907	4.6987	4.92363
RIMS2	5.3588	5.90313	2.89162	2.87879	2.62552	2.58001	3.16554	2.83454	3.29546	2.45402	2.90504
PAX6	8.54748	9.52149	3.11257	4.07036	2.87351	2.17307	3.53106	2.98226	3.20013	2.66515	2.53753
DNAJC12	5.36985	5.67817	3.33924	3.35337	3.30369	3.11157	3.48159	3.47221	3.18667	3.3596	3.61455
SCN3A	7.95003	7.97837	2.24572	2.94807	2.58669	2.7215	2.68953	2.35109	2.94807	2.65357	3.38997
PCLO	5.68973	5.59957	3.42353	3.13673	2.99384	2.89777	3.26444	2.95161	3.37214	2.91298	3.45923
PBOV1	8.05138	7.83255	3.6674	3.22602	3.21159	3.02091	2.31098	2.83607	2.91749	2.90073	2.6289
LPPR5	7.32871	7.68563	3.08832	2.7789	2.21876	2.57232	2.34452	2.56454	2.84864	2.42455	2.70715
LINC00643	7.50557	8.46931	3.19271	3.14739	2.5216	3.80169	2.99038	3.47075	3.27383	2.92182	2.49527
RIIAD1	7.16642	7.81172	3.16356	3.19817	2.4771	3.30613	3.48339	3.11029	4.07144	3.03434	4.34614
PCSK1N	9.97823	10.5276	4.56379	6.20956	6.18243	5.05124	5.38532	5.14728	5.82597	5.44756	6.2613
DCX	7.28265	7.86967	5.8263	5.74194	4.98147	5.03144	5.29677	4.73207	4.78399	5.26169	5.41976
MS4A8	4.92326	5.06994	4.13744	3.76194	3.71826	3.97442	3.92988	3.99207	3.98111	3.78003	3.75235
SYT14	4.86598	5.02139	3.20116	2.44634	2.2563	2.70242	2.85202	2.5563	2.97421	2.3115	2.22854
KCNMA1-AS3	4.32577	3.89571	2.89928	2.60563	2.52779	2.7561	2.9632	2.44644	2.87083	2.42024	2.13663
MTUS2	4.00883	4.0518	2.7786	2.59715	2.94807	2.94557	2.9266	2.93294	2.94807	2.81615	2.43975
MOB1B	7.5418	7.42809	5.64675	6.34865	6.07919	6.20647	5.64837	5.6011	5.55994	5.98988	5.98834
KDM7A	7.21081	7.38009	4.72401	5.29196	5.01288	5.23974	4.56172	4.73827	4.25544	4.75804	5.25984
QPCT	8.08076	8.16527	4.56395	6.01264	4.52511	4.53887	4.23276	3.4537	3.86067	4.64453	4.20419
PAM	7.90511	7.2389	5.17357	5.89983	4.93784	5.42551	5.17792	4.60879	4.98905	5.85662	5.6256
NBEA	7.56327	7.87129	6.10444	6.65348	6.58358	6.36908	6.13668	5.83281	6.4055	6.61212	6.23201
ERO1LB	10.8958	11.006	4.79418	7.57136	5.63694	5.59399	5.99382	6.25957	4.30209	5.09235	5.01151
MIR7-3HG	8.31458	9.24397	3.8775	5.69383	3.622	3.50825	4.57629	4.12608	3.5104	4.46727	3.40316
FAM222A	7.28382	7.51116	5.63362	6.09593	5.76598	6.00994	5.70289	6.13623	5.5443	6.01506	5.73766
LIG4	6.86308	6.78616	5.43626	5.82835	5.36995	5.66585	5.56993	5.99383	5.27453	5.32273	5.59333
LINC00948	6.12414	6.87906	2.99146	3.07766	2.65529	2.57634	2.46074	4.26959	2.68703	2.27613	2.2505
MIR3692	5.83506	5.99215	3.08418	3.83045	2.34532	4.3754	3.15291	3.83719	3.15191	2.92188	3.53079
MAP2	8.85087	9.00324	6.0984	6.72078	6.17159	5.61068	5.59946	6.22412	4.67595	5.57312	6.31581
CACNB2	6.92998	7.35073	5.66534	5.54739	4.93911	5.50208	4.99897	5.42407	3.88269	5.34798	5.54739
LOC283683	6.89301	6.43277	4.6407	4.41945	4.11462	4.23946	4.12762	3.39554	5.27463	3.31655	4.62292
ABCA10	3.59942	3.68015	2.84448	2.34975	2.35363	2.66104	2.73802	1.95765	2.87063	2.27913	2.47499
SCAMP5	7.618	7.20583	6.12511	6.40005	5.98601	6.21048	6.06526	5.67121	6.44969	5.40601	5.60708
KCNMA1	7.48971	8.09263	6.6007	5.46173	5.53921	4.94772	5.041	4.4785	5.54906	4.00862	4.23886
TMEM70	6.43982	6.20531	5.5222	4.99705	5.00672	4.41236	4.97782	4.71304	4.8634	4.73957	4.86491
KCNG3	4.82546	4.58149	3.23025	3.45271	3.33471	3.25521	3.64683	3.68651	3.78554	2.8417	3.38564
TMEM169	4.21739	4.25995	2.85321	3.01693	2.87127	2.91772	2.90808	2.93909	3.41036	2.4585	2.95919
ZCCHC18	5.60077	5.70302	4.08164	4.45213	4.07182	3.98835	3.72782	4.67143	4.74317	3.65535	4.30947
LRFN2	4.90368	5.1331	3.70612	3.39129	3.61599	3.48413	3.70277	3.87985	4.34401	3.58947	3.68935
C6orf1	5.78714	5.43316	4.01451	4.62912	4.48393	3.77029	4.01047	4.42878	5.04068	4.2966	4.45501
DDX11L10	5.03658	5.29593	3.18609	3.60434	3.6805	2.87679	3.56378	3.57676	4.28479	3.36165	4.23479
FAM46A	7.60413	7.62259	5.53902	5.78749	6.563	5.08516	5.48308	6.11085	5.87299	5.52031	5.65729
CACNA2D1	9.34662	9.45828	5.23786	6.40864	4.54915	3.58529	5.3311	4.40185	4.96386	6.0027	6.03651
SCG3	9.6843	9.55145	3.21221	5.60026	3.80404	2.61797	4.07874	3.93899	3.22043	4.97124	4.98318
STMN2	9.0725	9.33297	5.24775	5.69555	4.54959	4.22597	5.1165	4.36347	5.86621	6.05712	6.77091
DPP6	7.07177	6.43538	3.60374	4.04735	3.5363	3.21849	3.75041	3.33293	4.67595	4.18995	3.63509
SCG2	7.24471	6.44409	2.88637	4.12149	2.88637	2.45003	3.36374	3.40776	4.12502	3.42494	4.11117
GNG3	9.47101	8.77069	5.44138	5.17772	5.13432	4.88189	5.06967	5.08751	7.01646	5.6875	6.44744
MIAT	6.11773	6.13214	3.36067	3.25614	3.0227	3.59917	3.02029	3.19927	4.06617	4.01279	4.44126
MAPRE3	6.34064	6.60478	4.48501	4.97988	4.02791	4.64731	3.95762	4.61383	4.95279	4.91248	5.10284
ADAMTS5	5.81692	6.30066	3.61106	3.74698	3.39679	3.5665	3.41791	3.5952	4.19097	5.15537	4.76286
CACNA1C-AS4	6.72611	7.33828	3.1008	3.81152	3.00117	2.88668	3.13209	2.86124	3.49651	5.40333	5.17373
HADH	7.62399	7.89701	4.00358	5.56499	5.60971	5.07063	5.55992	5.32734	5.96582	5.88614	5.88584
PCDHB14	6.23768	6.67381	4.10922	5.06217	4.7466	4.21751	4.75763	4.82443	4.97162	5.44062	4.87822
CPE	10.5006	11.2514	7.75946	8.95907	8.88061	6.84633	8.23941	8.45202	8.19667	9.03769	9.12026
PCDHB18	6.2044	5.94112	2.9564	4.44457	3.62941	3.7143	4.46447	3.04234	3.51202	4.59104	4.31271
PCDHB7	4.70423	4.29902	2.55102	3.2962	2.44885	2.7793	3.53081	2.41482	3.53581	3.0272	2.97788
EMB	6.62672	5.98274	3.47212	4.60123	3.51439	5.1061	4.35828	3.46756	3.90297	3.50334	3.17627
TAS2R5	5.17292	5.37119	4.25864	4.51471	3.8209	4.63295	4.05398	3.63574	3.85567	4.2308	3.54686
INS	13.1751	13.4463	8.98068	10.6227	9.04787	6.90155	9.9933	9.48603	6.05224	6.64394	5.98634
ABCA5	7.46507	7.49107	5.13478	5.87753	5.00838	4.8274	5.58183	5.74275	4.16833	4.13132	3.88835
CRYBA2	11.0648	11.3513	8.20494	9.15361	6.87593	5.10728	6.83724	6.2744	5.25917	4.48678	3.82767
RCAN3	7.79477	7.63619	4.75915	6.23365	5.22398	5.14627	5.31182	5.50178	4.75801	4.27871	3.94204
GPRIN3	6.49416	6.82969	4.95273	5.35348	4.79202	4.6492	4.78938	4.96896	4.91441	3.83996	3.3559
GCG	10.9765	11.7406	8.67737	10.0997	8.99929	7.62974	7.3632	6.71247	3.39926	2.31884	2.61837
RAB3B	8.05746	8.63969	6.81191	6.67188	5.92334	5.82484	6.2999	5.70234	4.2459	4.23376	3.90053
DZIP3	8.25047	8.57187	7.2563	7.39577	6.97966	7.31104	7.21479	7.02107	6.45124	6.22449	6.79813
AK9	5.61464	5.70779	4.77018	4.48984	4.61592	4.48036	4.22541	4.83825	3.86351	3.61534	3.71057
VPS13A	7.90725	7.95706	6.51795	6.96921	6.81966	6.70232	6.62688	6.74123	4.96324	4.8006	5.67101
CMIP	7.10746	7.04189	5.28497	5.98664	5.59577	5.23228	5.74161	5.35695	3.52776	4.24132	4.57878
MPP6	8.08173	7.68865	6.11054	6.45347	6.94595	6.26785	6.5272	6.70554	4.33013	5.45023	5.08364
SLC36A4	6.73293	6.81277	5.53895	5.72704	5.76805	5.10261	5.33896	5.02286	3.44868	4.63898	5.16561
RFX3	7.60046	7.98089	5.94648	6.81041	6.36185	6.14717	6.12206	6.95836	4.76141	5.88437	5.96754
CXXC4	7.85906	8.02248	5.09478	6.00775	5.45269	5.95357	5.70305	6.90748	3.4258	4.82056	5.42026
GDAP1	8.5975	9.20822	6.19183	7.18268	6.63652	6.74988	7.70747	7.06955	3.86287	6.06066	6.65871
APOH	4.53965	4.14532	6.64985	6.1597	6.99122	5.27724	5.20899	5.52803	4.15998	3.17958	3.27355
CFAP43	3.84013	3.751	5.65243	5.50375	5.80397	4.42536	4.29526	4.63904	3.53704	2.608	2.73138
ELF3	4.44464	4.44464	6.00283	5.68232	6.41572	4.75577	5.08789	5.01542	2.94841	2.99015	3.03074
ANXA3	2.67949	3.70717	7.24049	6.7734	7.97058	5.71449	5.43205	6.5612	2.99886	2.84662	2.72508
EFNA4	3.40905	3.677	6.38127	5.97699	5.76722	5.20488	4.84138	4.23493	3.74987	3.79322	4.22271
ITIH2	3.42862	3.37278	5.51446	5.63124	6.4553	3.07205	3.32609	3.54504	3.81524	3.43857	2.941
DDX11	4.43121	3.88345	6.12461	5.31959	5.24767	4.05963	4.53378	3.4721	3.84718	3.57571	4.50935
KCTD16	5.22013	4.89382	5.85724	6.58145	6.1129	7.3342	7.40704	7.14998	4.90893	3.97665	4.16904
MIR432	2.42093	2.44615	5.67577	6.63298	6.01741	6.94316	8.0607	7.802	2.9111	3.09738	2.49214
CEL	4.73878	3.77674	4.06519	5.0931	5.36233	6.32199	8.12359	7.44185	3.30457	3.40528	3.07016
ZNF385B	4.14318	4.26831	4.57165	5.49637	4.74203	6.44306	6.94825	6.77	3.8992	3.71811	3.60456
CTRB2	3.86315	3.5186	5.49793	4.37544	3.77495	7.07926	6.955	9.0597	4.79354	2.27507	2.76129
SERPINI2	2.87882	3.38829	4.76871	4.16963	5.13772	5.93647	6.92772	7.79285	3.74161	2.5739	2.7056
COL6A3	4.90962	5.72366	4.03657	4.30659	4.51673	4.24694	5.14298	4.33827	9.29285	11.3236	10.9989
ZEB2	4.87342	5.1477	4.18414	3.77685	4.23973	4.63047	4.62702	4.48842	8.32496	10.0379	9.75342
PDGFRA	3.7035	4.36758	3.84327	3.96059	3.74819	4.08244	3.84062	3.79714	8.16856	10.1291	9.92941
PCDH18	3.79459	3.60795	2.82346	3.71843	3.2924	3.57626	3.78521	3.26456	7.77965	10.1547	9.9456
PIEZO2	4.20946	3.82971	3.82579	3.58595	3.47813	3.69288	3.84615	3.71947	5.94032	7.10681	6.86125
FBN2	3.68925	3.19174	3.45565	3.05029	2.95267	3.11921	3.30375	3.03631	6.70417	8.58339	8.29481
COL3A1	5.74962	5.14111	4.40575	4.38826	4.22679	4.21533	4.9754	3.89936	9.2309	10.8026	11.0695
SPARCL1	4.24317	4.10227	3.87418	3.67869	3.47693	3.87193	3.74969	3.85456	8.63061	9.70886	10.1774
ANXA1	3.8564	3.50663	2.80121	2.8912	2.68466	2.60879	2.50278	2.77315	7.38062	8.36747	8.57346
C7	5.00391	3.64663	3.8122	4.01873	3.92111	3.50059	3.40254	4.12253	9.49186	10.5457	10.7047
ASPN	4.84943	4.70536	3.86426	4.23366	3.76615	4.35332	4.22173	4.4609	8.78631	9.82086	9.23392
PTN	6.52786	5.28271	5.05498	5.6811	5.36554	5.74357	6.00056	6.07504	9.73835	11.0119	10.9719
COL12A1	4.5665	4.87801	3.97734	5.16713	4.42933	4.19136	4.73178	4.17854	8.47786	9.20392	8.9299
TMEM158	3.57861	3.59554	2.99703	3.33146	3.53557	2.79631	3.38104	3.36177	5.60318	6.28363	6.39665
SRPX	3.42766	3.21292	3.78727	3.3535	3.37697	3.43049	3.76899	3.58855	6.37288	7.40379	7.77061
HSPB6	2.1743	2.35207	2.46249	2.1074	2.57308	2.10921	2.63456	2.62644	5.27173	6.40559	6.29771
ARHGAP42	4.00038	3.90831	4.9145	4.18012	4.33125	4.6492	4.49642	4.58398	7.20202	7.96548	8.17707
EDNRA	3.58045	4.12776	4.2815	4.26561	3.6781	3.86464	3.86492	3.51617	9.06903	10.2537	9.84084
LUM	2.97381	4.22671	4.2251	3.25749	3.57544	3.48202	3.0758	3.22668	9.25786	10.7807	10.91
DCN	5.30372	4.66538	5.37837	4.30687	4.32394	5.59129	5.30013	4.16742	9.98331	11.5157	11.3422
LPHN3	3.92086	3.77205	3.50897	3.32708	3.29194	3.22463	3.34122	3.40446	6.07755	6.29436	7.16736
BAI3	2.9883	3.29906	2.66982	2.52597	2.79669	2.48776	2.61876	2.56635	5.86581	6.27968	7.0222
ABI3BP	3.70788	3.41938	3.39964	2.73634	3.10492	3.1119	2.96381	3.00086	5.97982	5.83152	6.58535
SLITRK6	3.32237	3.41111	2.79425	2.76761	2.75445	2.57106	2.85759	3.17428	5.29734	5.81707	7.00707
LPAR4	3.62955	3.17204	2.99146	3.4395	2.6561	3.13474	3.03548	3.15107	5.11487	5.45592	6.10169
DNM3OS	4.08409	3.67915	4.31166	3.74762	3.74846	3.98558	3.654	3.78295	8.56547	8.17143	7.86854
HOXA4	2.83479	2.64184	2.86841	2.69868	2.63192	2.47846	2.59401	2.74489	5.69842	5.83716	5.35847
IFI44	2.53559	2.77723	2.61998	2.29082	2.90637	2.38623	2.45196	2.35929	5.21518	5.13831	4.9486
ACTG2	2.73741	2.43336	2.87653	2.51588	2.27056	2.51374	2.30942	2.14019	4.77794	5.54723	4.76422
COL14A1	4.49553	4.49499	3.45654	4.01131	3.6336	3.51618	4.12379	3.40469	6.68697	9.15569	9.0064
LAMA4	4.77944	4.78368	4.04088	3.85802	3.80963	3.76278	4.21361	3.96219	6.38205	7.9681	7.94151
GLI3	5.09861	5.12315	4.22193	4.03908	4.11771	4.14659	4.05617	3.89504	6.71332	8.80134	8.21303
RYR2	3.39464	3.74961	2.91637	2.81314	2.86061	2.9831	2.78297	3.01018	5.40253	7.18358	6.61894
PALLD	5.29118	5.19344	4.77224	4.85044	5.08065	4.63845	4.91492	4.67288	5.96361	6.90897	6.96125
TMEM132C	4.08758	4.30323	3.7468	3.58973	3.27474	3.50983	3.64854	3.65546	5.40404	6.10918	6.44928
ITPR1	4.08826	4.33692	4.12614	3.59434	3.65773	3.78943	4.09629	3.65627	5.32842	6.5464	6.24952
DLG2	3.35287	3.48113	3.24482	2.78132	2.98601	3.11038	3.29475	3.07887	4.33572	5.25015	5.03871
TSHZ2	5.22912	5.76802	5.32074	4.62276	4.58427	5.07171	4.94651	4.52506	6.72841	8.43623	7.66796
CD248	4.59259	6.13421	4.30635	4.34964	4.95385	4.50663	4.83539	4.7164	7.49111	10.3912	10.1579
GFRA1	4.30947	5.32521	4.32862	3.93161	4.42951	4.10743	4.2222	3.9025	6.22784	7.87596	7.80312
PDE1A	3.45782	4.37107	3.13862	3.06973	2.90607	3.76981	2.94682	3.1882	5.41549	7.2013	6.92649
GPC6	6.06059	6.50193	5.83575	5.76007	6.10879	5.04759	5.81832	5.17664	7.96024	9.71254	8.9136
SFRP1	6.58663	7.20613	4.99659	5.52876	4.86542	4.54642	5.06998	4.47662	9.78194	10.7091	10.6476
SULF1	4.70123	4.8785	3.0971	2.84665	2.63008	2.87632	2.66819	3.07219	8.20281	8.35209	8.13381
AKAP12	4.90749	4.83017	3.62961	3.72678	4.03127	4.16996	3.97314	4.14782	7.31927	7.81365	7.9396
CD34	3.32941	3.17306	2.51517	2.43452	2.48747	2.84358	2.58913	2.53958	4.09731	4.50369	4.75886
LAMA2	4.08004	3.67989	3.73765	3.34395	2.9144	3.73094	3.38366	3.23297	6.1707	8.31311	8.48608
GRID2	2.55461	2.20407	2.60239	2.23554	2.02497	2.27185	2.31237	2.26293	4.22404	5.41732	6.00174
GHR	2.1935	2.58364	2.47297	2.35207	1.81947	2.33907	2.10346	2.10346	4.12034	5.0342	5.65396
ST6GALNAC3	3.40348	3.498	3.67812	3.06075	3.27464	3.56198	3.30119	3.71596	4.60911	5.67159	5.82398
SHC4	3.27845	3.45754	3.59454	3.23712	3.22325	3.38003	3.24155	3.32902	4.36954	5.14449	5.16785
HOXA2	3.40444	3.05555	3.24399	3.28267	2.82407	2.48994	2.75096	3.26384	5.20241	7.13656	8.1086
BGN	4.7383	4.61479	5.57287	4.96086	4.78767	5.16423	5.38589	5.22196	7.2412	9.69513	9.52249
PRELP	4.36829	4.1622	4.19982	4.0526	4.00753	4.61322	4.12539	4.2984	5.26074	5.86182	6.43984
NGF	3.05027	3.03765	2.76161	2.68614	2.78146	3.37981	2.9307	3.06503	4.50462	5.63415	6.29264
SPON1	3.53348	3.05998	3.29872	3.09469	3.02088	3.71208	3.34774	3.28479	4.37426	5.40863	5.54456
THY1	5.1942	5.40593	5.059	4.76555	4.95751	5.63074	5.8358	5.68219	7.40303	8.83688	9.70746
LAMC3	4.31083	3.73274	4.3003	3.56983	3.56854	3.6372	4.04112	3.83434	5.07043	6.42221	6.72818
SOX2-OT	3.04521	2.6757	3.2876	2.46685	2.44414	2.82766	2.88389	2.84704	3.72948	4.51575	4.95528
FXYD5	4.00211	3.51881	3.75581	3.28843	3.68337	3.56244	3.6877	3.98552	5.51033	6.22413	6.39487
TRHDE	3.00061	2.30775	2.75899	2.37645	2.19336	2.37161	2.54003	3.00302	4.39396	5.09745	5.62412
COL5A2	4.43494	4.13975	4.19452	3.21354	3.12412	3.27228	3.80947	4.18359	6.90189	8.52255	8.5433
SLITRK3	3.23567	3.03205	2.85839	2.55192	2.93569	2.76437	2.53665	3.2529	4.27738	4.94642	4.90311
NEFL	3.12749	3.08705	2.89075	2.52287	2.97822	2.77722	2.82484	3.18133	3.98067	4.54689	4.46284
RHOJ	3.62685	2.97049	2.93012	3.50459	3.39518	3.20821	2.90802	3.51483	4.90033	6.5704	6.77596
CYBRD1	3.70013	2.94631	2.67474	2.99448	3.10611	3.0678	2.91134	3.5597	5.22224	6.79779	6.49314
MYLK	4.4697	3.79196	4.39849	4.00891	4.24849	4.1603	3.79174	4.6072	6.33762	7.70936	7.41027
HTRA3	4.46342	3.97277	4.46413	4.07732	3.8899	3.69366	4.10082	3.85248	5.66041	7.66644	7.10802
FILIP1	3.48678	2.96002	3.46299	3.07039	2.93984	3.28834	2.93949	3.06022	4.42544	6.37328	5.66316
UBA7	3.43448	2.96594	3.17649	2.60689	2.96413	2.84769	2.79973	3.07989	4.27489	5.93416	6.00998
ADAMTS12	3.45397	2.84016	3.39202	2.88556	2.94172	2.75966	2.75909	2.95407	4.1916	5.61238	5.56111
KCNN2	2.79995	2.56467	2.60318	2.58186	2.2771	2.41446	2.33221	2.68222	3.41256	4.13322	3.83509
EMP1	3.60578	3.69873	3.54674	3.09966	3.0674	3.19905	2.99095	3.67361	4.54298	5.00609	5.40982
COL6A6	4.26999	4.16641	4.26497	3.59547	3.96881	3.91246	4.03575	4.06197	5.74102	7.14026	5.91521
BOC	3.57477	2.92065	3.28827	2.94782	3.18407	2.83388	3.18763	3.23391	5.26391	6.91075	5.85523
FLNC	4.70815	4.24661	4.13256	4.30307	4.4278	4.10367	4.48299	4.4857	5.38492	6.09994	5.40514
EBF2	3.35884	3.29517	2.75309	2.91562	2.96134	2.78164	2.96134	3.35062	4.5927	5.6381	4.65123
EDNRB	4.74176	3.75554	3.8826	3.66085	4.13491	3.24728	4.0714	4.08528	5.8477	7.89432	7.23225
THBS2	4.30182	3.44821	3.52387	3.75893	3.77844	2.9393	3.92003	4.23808	5.52919	7.36503	6.29042
HEPH	4.23967	3.84946	4.20904	4.24865	4.04753	3.92374	4.40376	4.29827	5.08704	5.85108	5.50986
THBS4	4.42844	4.34097	3.9065	4.00608	4.10149	3.63667	4.5111	4.36429	5.07902	6.02657	5.48666
APLNR	4.24769	3.83267	4.19359	3.07737	3.49268	3.22415	3.80311	3.72048	5.06301	6.39776	5.79462
COL1A2	6.12741	5.14284	5.07044	4.9258	4.71387	5.05819	6.66716	5.85849	8.74451	10.985	10.8606
SFRP2	5.13182	4.17131	4.30656	4.10949	4.05902	4.54475	5.21826	4.68046	7.08643	8.70192	7.94046
TTYH2	4.41604	3.96517	4.20265	4.27542	3.85431	4.25249	4.56306	4.33363	4.96133	5.89996	5.8534
COL21A1	3.5963	3.68262	3.66896	3.66149	3.23471	3.36893	5.2936	4.24659	5.74865	8.39312	8.17259
PCSK5	3.47922	3.18476	3.48364	3.19235	3.24216	3.68561	3.29707	3.56034	4.51047	5.61012	5.02612
CYSLTR2	2.94063	2.46359	2.69247	2.36999	2.24654	2.94543	2.31247	2.85586	3.96357	4.62549	4.25441
NKAIN4	3.44038	3.16657	2.8237	3.0882	3.04101	3.55623	2.9523	3.26539	4.62791	5.30965	4.79085
NRP2	3.84494	4.08826	3.62374	2.99754	3.73274	3.92171	3.30413	3.81021	5.3127	6.74815	5.97135
ADCYAP1R1	4.16744	3.99388	4.07394	3.59501	3.66375	4.06473	3.67719	4.06499	5.29233	5.85278	4.82127
CACNA1G	3.85931	3.45131	3.27239	2.86324	3.01362	3.32209	3.12942	3.45774	5.00367	5.39551	4.86306
CMYA5	3.14684	2.89344	3.12605	2.69951	2.73855	3.04865	3.31521	3.195	4.53562	4.98453	4.41417
AFAP1L2	4.72668	3.98676	3.09608	3.33444	3.49234	4.07357	3.93163	3.63434	5.53686	7.07193	6.34879
NCALD	4.08545	3.61852	3.3767	3.54871	3.63579	4.10416	3.96621	3.6483	4.81918	5.57981	4.98133
GAL3ST4	3.54062	3.22741	3.45492	3.39211	3.1432	3.66863	3.1339	3.32719	4.33867	4.83383	4.95385
LOC90768	2.87653	2.6683	2.87334	2.36932	2.36572	3.26339	2.27009	2.67039	3.6045	4.11584	4.59171
NWD2	3.78256	3.50177	3.72025	3.07652	3.40672	3.90565	3.61958	3.33158	4.38677	5.43086	5.29296
SPRY4	3.42958	3.67895	3.47356	3.26719	3.49033	3.59292	3.30848	3.44955	4.43401	4.5494	5.11639
CCL2	2.4658	2.46301	2.46879	1.93467	2.52884	2.44955	2.17137	2.85871	4.77084	5.03504	6.88568
MEOX2	3.73399	3.34984	3.23587	3.12898	3.25194	3.66919	3.10756	3.14479	5.01498	5.12415	6.61948
CHSY3	3.3869	3.43404	2.91735	2.9117	3.457	3.26602	3.26271	3.62572	4.84101	4.54414	5.54259
RASA3	3.37101	2.95729	3.62124	3.09424	3.22574	2.74902	3.31306	3.37304	4.25307	4.76067	5.61654
TNC	3.15045	2.78591	3.43288	2.68844	3.09674	2.69438	2.98796	2.93374	4.47159	4.9219	5.00841
ARHGAP31	4.43489	4.24352	4.81448	3.82186	4.0542	4.31351	4.0908	4.00868	5.2511	5.4126	5.80957
HAND2	4.18345	4.44939	3.48505	3.97065	4.57712	4.24946	4.56737	4.23156	6.02081	7.65203	7.90276
GAS7	3.49497	3.21447	2.68606	2.72361	3.32369	3.71021	3.44674	3.51022	4.46407	5.6177	5.56149
PPP1R14A	4.01544	3.70414	3.53224	3.42991	3.85189	3.64932	4.06157	3.96673	4.54568	5.1862	5.51765
COX7A1	5.08759	4.79257	4.02507	4.36899	5.74512	3.9845	4.64903	5.58574	7.62565	8.47703	9.26914
C1orf54	3.41647	4.28415	2.58413	2.86553	3.92497	2.78827	4.38347	5.25763	7.03544	8.71938	9.03265
COL6A2	5.81224	5.91776	4.99517	6.20853	6.431	5.69048	6.02481	6.34697	7.29825	7.94038	8.12926
LEF1	3.12202	3.57989	2.77116	3.67552	4.50641	3.20124	3.2851	3.50917	5.20454	6.2755	6.53148
TUBB6	5.77169	5.35963	4.58951	4.86171	4.82092	4.59811	5.09169	5.46787	6.7216	7.30834	7.08158
ZNF469	4.32182	4.20081	3.31378	3.91832	3.74007	3.7006	3.76476	4.43671	5.19083	5.90394	5.26597
JAM2	5.02825	4.82231	4.0021	4.78624	4.19241	4.19112	4.01238	4.61776	5.55159	6.06956	6.15892
LDHB	7.5085	6.8325	4.72331	6.17219	6.95964	6.26742	6.69525	6.45936	9.5548	10.0083	10.3789
DPPA4	2.93646	2.65397	2.37001	2.6037	2.7653	2.54383	2.3278	2.72432	3.80721	3.80695	4.13499
NR2F1	6.16313	6.34935	5.74045	6.01321	5.80761	4.68672	5.62091	5.86177	7.13724	8.37851	7.89985
TWIST2	2.79608	3.11486	2.72817	2.56769	2.40274	2.17792	2.7732	2.83293	3.52498	4.48588	4.30091
CTSC	4.20701	4.41167	3.70969	3.85861	3.92235	3.44996	3.98397	3.93618	5.03239	5.28342	5.8436
CYTL1	4.04086	4.04035	3.50455	3.51556	3.96825	3.47984	3.72947	3.96579	7.31771	6.56934	6.93633
HIC1	2.63256	2.80609	2.4789	2.32181	2.49154	2.33942	2.49662	2.60751	4.14405	3.94227	4.23366
DPT	4.12306	3.55491	3.41369	3.25866	2.83047	2.8357	3.19963	4.06257	8.25969	6.92581	8.29604
BCHE	3.77753	3.61716	3.63528	2.55715	2.79869	2.50485	2.66387	3.33348	8.10552	7.13715	7.07896
PGM5P3-AS1	1.58986	2.65911	2.18715	1.75036	2.35926	2.39825	1.94559	2.10736	9.81185	7.21508	7.63739
SCN2A	2.13402	2.24333	1.97131	1.88003	1.90405	1.95691	2.02947	2.06514	3.80604	3.12426	3.38004
GNG11	2.95772	2.23325	2.26601	1.99984	2.79708	2.38351	2.52503	2.91128	6.46284	5.08991	5.52594
MTMR11	3.11124	3.20125	2.89609	2.85577	2.94796	3.16472	2.9676	3.27441	4.20755	4.08925	4.30282
MIR1243	2.49744	2.45304	2.51517	2.0718	2.43594	2.55441	2.41381	2.51575	3.68663	3.57664	3.84396
HAND2-AS1	4.34797	4.86184	4.25028	3.60624	4.8149	4.03511	4.83744	4.03975	8.1719	7.82405	8.59821
OGN	4.60676	5.1371	4.21447	4.07926	4.49611	5.58978	4.9521	4.51175	10.5402	9.86558	10.2332
IFI16	3.23923	3.31086	3.04538	3.00522	2.83545	3.68088	3.11049	2.86916	6.93316	7.03564	7.07962
LRRC17	2.95187	2.9418	2.97551	2.93699	2.77458	3.23386	2.74681	2.95312	5.62056	5.10409	5.3207
DACT1	3.0929	3.29991	2.89316	3.17584	3.1263	3.52828	3.37919	2.86498	4.84538	4.85854	4.80643
INHBA	2.25739	2.3589	2.27954	2.13193	2.13486	2.73293	2.2068	2.22942	3.60674	3.29681	3.31885
MRVI1	3.85927	3.7925	3.49837	3.32255	3.20933	3.35295	3.57384	3.27871	5.01379	4.78138	5.22251
KCNQ5-IT1	2.63554	2.28719	2.37368	2.03481	2.18516	2.3209	2.37243	2.00399	5.06887	4.08397	5.60385
ZNF536	3.57377	3.15424	3.76576	3.19842	3.27482	3.24803	3.61652	3.52516	5.05532	4.52478	5.27448
AR	3.17934	2.97865	3.27534	3.01067	3.13315	2.98844	3.05352	3.40071	5.51747	4.90459	4.60198
ARHGAP20	3.23701	2.86411	3.18481	2.85226	2.78622	3.06508	3.18511	3.08552	5.22703	4.50709	4.07394
RGS7BP	2.97442	2.69534	2.66583	2.62322	2.53366	2.63206	2.58579	2.64346	4.32873	4.16061	3.61448
LINC01474	2.82582	2.72279	2.75653	2.51822	2.57499	2.54279	2.17663	2.78129	4.97082	3.95737	3.96481
ABCA8	3.31748	2.9215	3.5566	2.85739	2.94923	3.20592	3.09319	2.93129	4.87862	4.36065	4.41528
WIPF1	4.97599	4.54501	4.48256	4.13885	4.20772	4.6243	4.89147	4.0104	6.43337	5.88408	5.81478
RERG-AS1	3.99369	3.47981	3.91989	3.81679	3.76469	4.3031	3.62009	3.8363	5.47863	4.62818	5.03096
SNHG18	6.08614	5.93095	5.06732	5.13571	5.69145	4.67368	5.54692	6.14674	8.23874	7.70144	7.88655
DISC1-IT1	3.13321	2.99224	3.12518	2.74918	2.6648	2.45867	3.07582	3.55754	4.87707	4.3806	4.4312
TBX2	3.78727	3.58397	3.71351	3.6632	3.73527	2.64131	3.708	3.67117	5.34125	5.14299	5.36695
ARHGAP10	4.72683	4.92739	5.03111	4.36155	4.8388	4.25961	4.55276	5.05221	5.92449	5.91439	5.75684
TWIST1	3.36035	3.33221	3.32525	3.0144	3.21733	3.23855	3.04066	3.72707	4.50205	4.62384	3.99288
GEM	3.16709	3.10561	2.87127	2.91685	3.40903	2.97135	3.16822	3.57265	4.56212	4.54199	3.94904
PCDH9	5.38174	5.29573	4.13854	3.71727	3.86573	2.68297	3.39301	3.85896	7.03867	8.30678	7.48829
MMP16	5.0224	5.28279	4.63961	3.63969	3.64179	3.35175	3.67582	3.80277	7.01684	7.77045	7.19861
ACTA2	7.16867	6.60982	5.91909	5.04393	5.6681	4.92818	5.53068	5.93165	9.10336	8.63745	8.31439
NR3C1	5.57376	5.38034	4.20237	4.05791	4.63469	4.30989	4.01392	4.78616	6.36097	6.76659	6.572
STAMBPL1	4.18929	3.66593	3.04661	3.14959	2.44544	2.81068	2.12815	2.39527	6.37247	5.57177	5.42559
NFIA-AS2	3.40927	3.28	3.59934	2.94055	2.82938	2.85445	2.72633	2.60876	4.63519	4.93916	4.37008
SLIT2	6.1066	6.29073	6.90198	7.15481	6.96914	6.54192	6.73384	6.38918	9.19056	10.1821	9.73632
LIFR	4.63486	5.30811	5.6402	5.64745	5.42445	5.6524	5.37307	4.97489	8.452	9.31458	8.99625
GUCY1A3	4.01815	4.27278	4.54134	5.09504	4.74294	4.76588	4.88453	3.81649	6.46052	8.39431	7.87475
FGFR1	4.96808	4.81742	5.53841	5.21432	5.62772	5.2775	5.16444	5.26794	6.50306	7.5122	6.71329
SH3D19	4.52527	4.71156	4.66365	5.81919	5.50713	5.50099	5.08492	5.23082	7.3183	7.79753	7.26334
FAM114A1	3.70959	4.24666	4.69542	4.77615	5.36916	5.07692	4.68598	4.58703	6.75854	7.17203	6.51049
GFPT2	2.82819	2.82702	3.0653	3.19235	3.00805	3.36572	3.31488	3.36572	4.61043	4.95869	4.30791
GBP1	2.71531	2.08101	2.76254	2.70372	2.67512	3.53944	3.35979	2.71189	4.85723	5.94225	5.38703
PIK3R1	6.52699	6.3922	6.62136	7.2123	7.37522	6.9209	6.8815	7.51826	8.31124	8.90549	8.95023
SPARC	4.19113	4.71291	5.26165	5.84007	6.29549	4.86389	5.75922	6.08399	8.60225	10.2487	9.87826
PLCE1	4.94334	5.54007	5.80232	5.92484	5.98122	5.10511	5.29735	5.76452	7.00397	7.56422	7.3728
F2R	5.15454	5.63669	5.32621	6.17198	5.7985	5.22317	5.35618	6.0518	6.41782	7.40886	7.2546
NRP1	4.44597	5.4376	6.93443	6.24694	5.99547	6.13448	5.42868	4.57801	7.77163	9.62304	9.43089
LPAR1	3.22863	3.15101	4.86315	3.8307	3.98471	3.88859	4.1345	3.29305	5.00216	6.42716	5.95054
GLIPR2	4.22539	4.81746	4.42027	4.72686	4.84717	4.58688	3.75215	4.27946	5.49445	6.6284	6.09852
PPAP2A	5.70854	5.3283	4.88517	5.28239	5.66029	5.95802	5.2273	5.45214	7.04276	7.1946	6.78105
TMEM45A	3.69561	3.84773	3.20652	4.17113	4.26127	4.76971	3.47198	3.71978	5.69149	6.14981	5.45045
PTEN	6.1006	6.69857	6.73512	6.06966	6.35623	6.72418	5.75465	5.78892	8.37028	8.49692	7.53526
GPR133	3.90105	3.49145	4.36231	3.33695	3.45587	3.60296	3.90663	3.68875	4.72466	5.60942	4.67815
ACOT9	4.42223	3.9235	4.90073	4.35491	4.61727	4.77657	4.26697	4.80389	5.45837	5.714	6.06617
CHST11	4.09159	3.61852	4.17866	3.80985	4.3832	4.29056	4.12945	3.6333	4.9557	4.95892	5.85543
IFITM3	7.31794	7.45168	8.95821	9.53853	10.2988	9.71014	9.1571	10.253	10.8911	11.3417	11.6327
ADAMTS1	3.93559	3.73805	5.28626	5.85278	6.22539	5.5833	5.62019	5.78167	6.74001	7.29755	7.17884
OSBPL1A	4.60541	4.2071	5.63415	6.38919	6.14352	6.00043	5.77214	6.08793	6.99358	6.92473	7.29463
NEAT1	7.38412	6.81716	8.33084	8.83599	8.78358	8.47045	8.80414	8.98545	9.70645	10.092	9.52213
CALD1	6.38227	6.10783	7.07061	7.42317	7.75145	7.00882	7.52052	7.91486	8.61049	9.12469	8.88912
ANTXR1	2.839	3.66809	5.37228	5.75136	5.5864	5.17122	5.25496	5.16149	7.30909	8.11237	7.47668
CCDC80	3.4121	3.04514	5.28901	5.22486	6.04156	4.23607	4.55311	4.60998	6.4067	7.85593	7.59311
PPP1R15A	4.98864	4.67683	5.48223	5.1113	5.81132	5.27628	5.73616	5.59431	6.41206	6.63877	6.71824
2007-09-01	7.9069	8.30192	9.19678	8.28438	8.8823	8.52916	8.85083	9.0597	10.19	9.62581	9.66206
ZFP36	5.28476	5.34766	7.90832	7.06672	7.63602	7.00557	7.68435	7.10961	9.28017	8.43367	8.48653
FKBP5	3.49674	4.03647	4.14075	4.54399	4.36863	4.12723	5.00059	5.51425	8.02929	6.92641	6.10652
PLXDC2	5.00667	5.49307	6.24203	6.8359	6.05211	6.4175	6.83672	5.59363	7.79933	7.61596	8.21698
PTX3	4.17265	4.12539	4.45272	6.02693	6.04986	4.90514	5.41457	4.94141	8.2337	7.25199	8.04616
FOLH1	2.29719	2.53229	2.3962	3.49478	2.98706	1.37954	3.63538	1.53192	4.81918	5.2431	6.89226
KIAA0922	6.7396	6.75538	5.10976	6.27972	5.65609	6.48321	7.3368	6.656	8.37992	7.99418	7.53799
